# Supplementary material
Source: Springer Nature journal article supplement (https://www.springermedizin.de/resource/supplementary/13045_2012_209_MOESM1_ESM.pdf/9660862)

# ASXL1 (20q11)

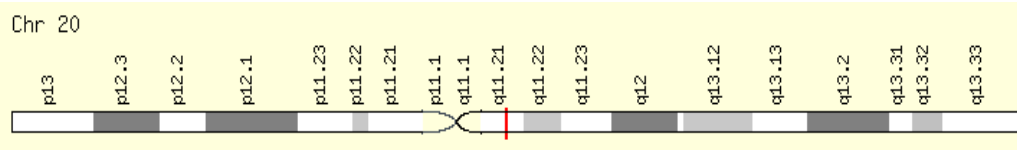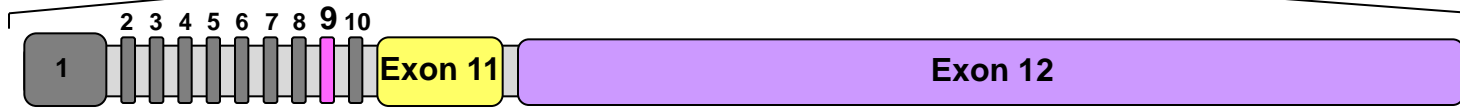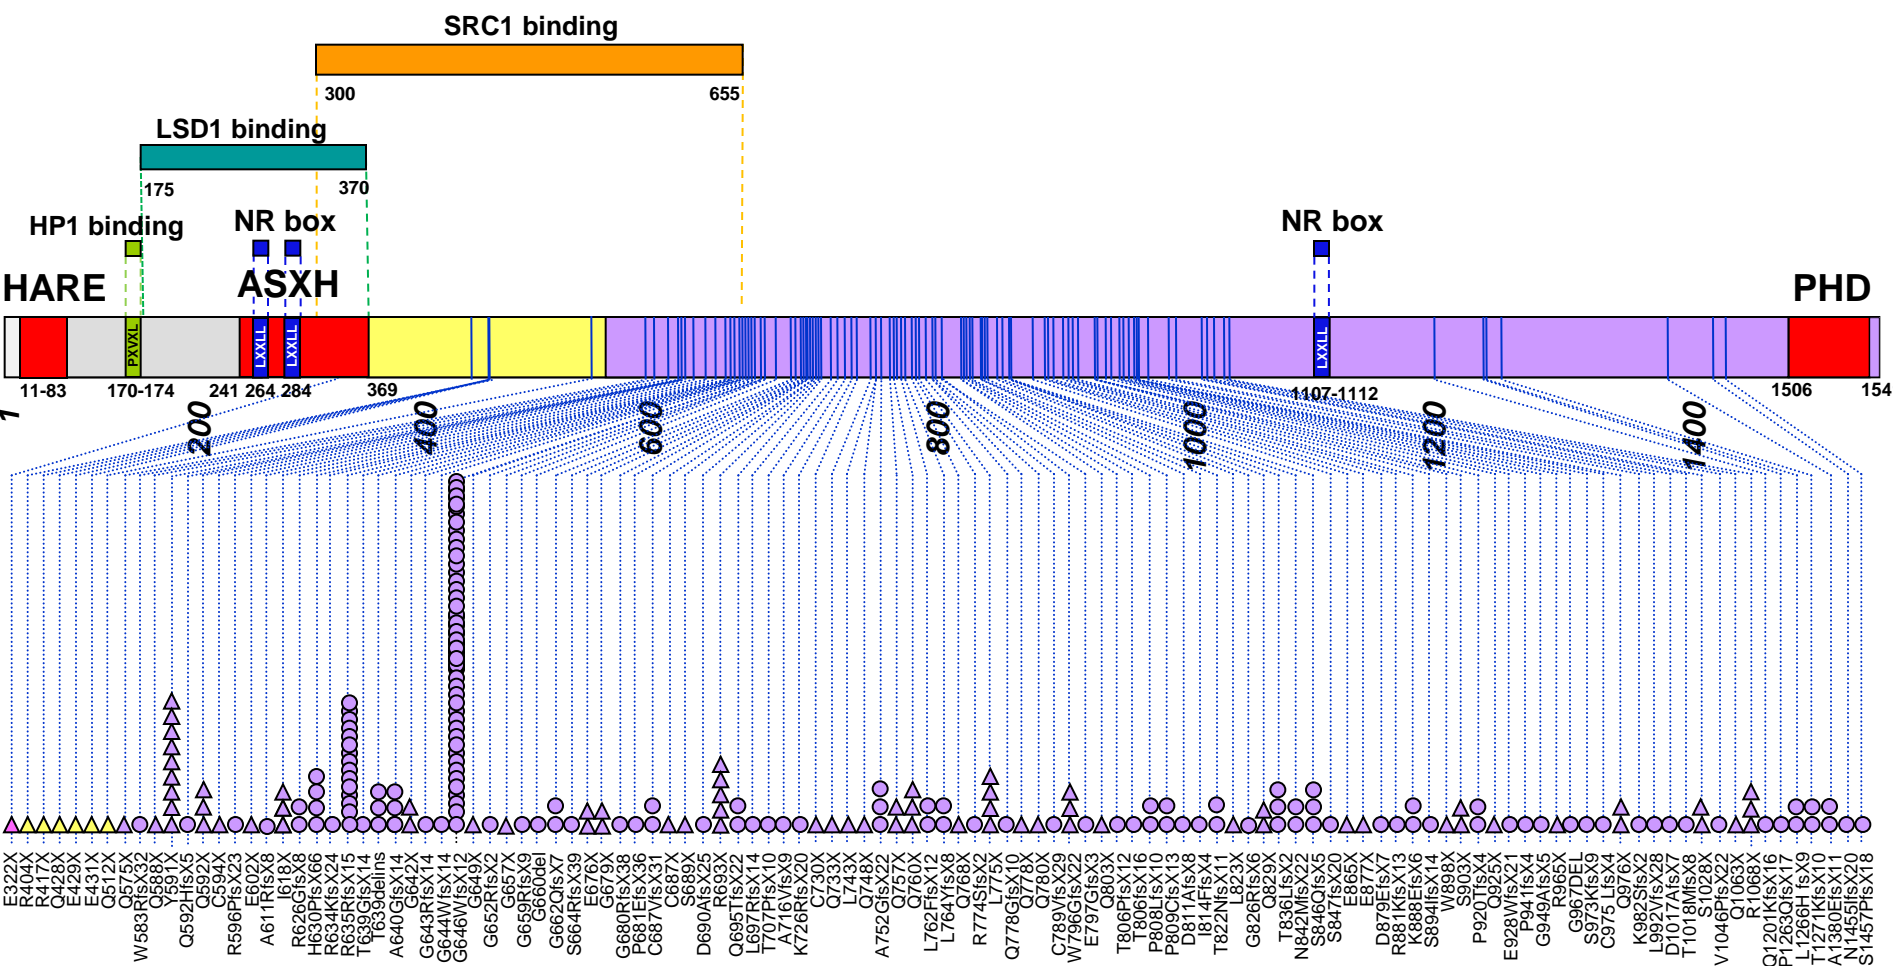

Supplement: MOESM1 [file 9660862]
